# Supplementary figures and images for: Static and dynamic features of granular material failure due to upward pulling of a buried sphere by a slowly increasing force
Source: Royal Society of Chemistry journal article supplement (doi:10.1039/d0sm01914c), 2021-01-01

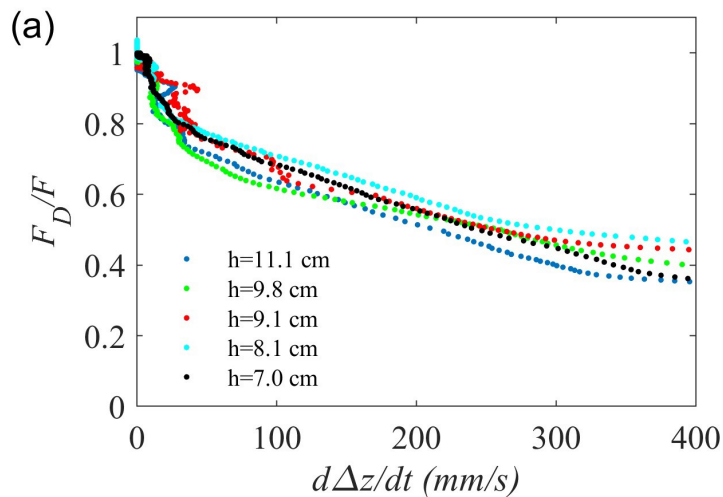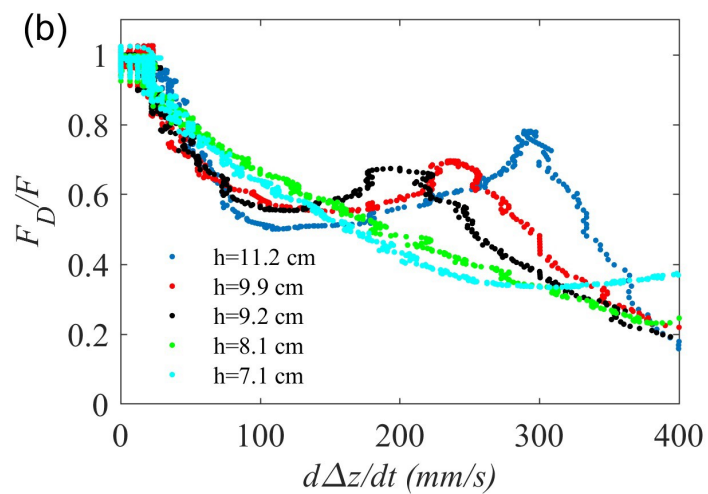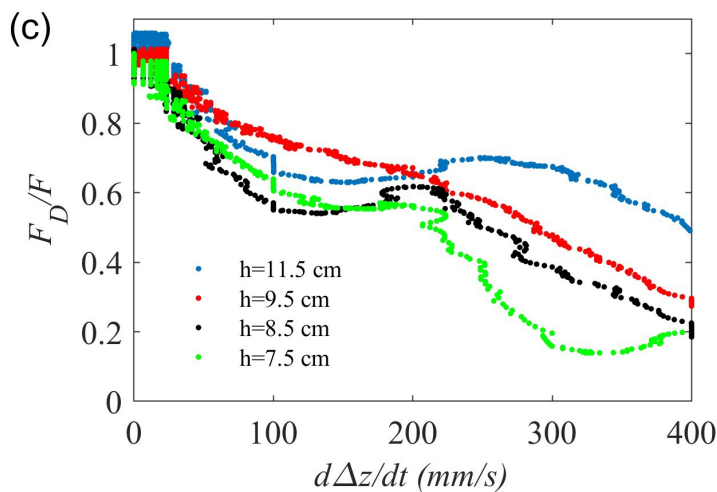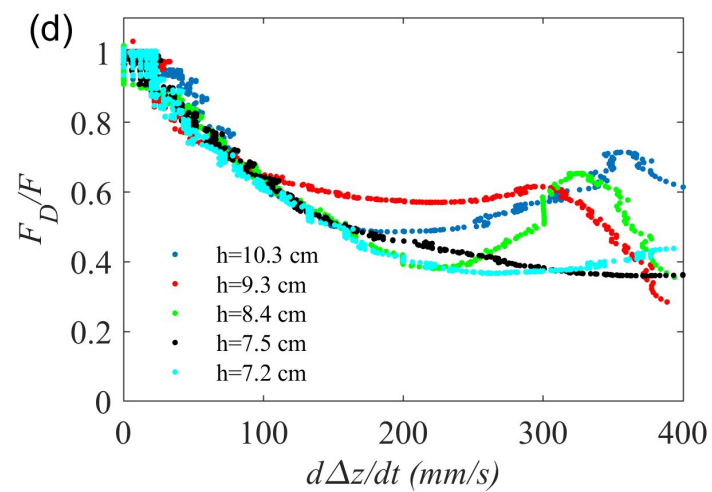

Supplement: d0sm01914c1.pdf [file d0sm01914c1.pdf]
